# Supplementary material
Source: publisher figshare collection journal article supplement (https://acs.figshare.com/ndownloader/files/4717687)
Supplement: Supplementary file 1 [file 4717687]

## ***Supporting Information-1 (experimental procedures and spectral data)***

### **Novel Formal Synthesis of Cephalotaxine via a Facile Friedel–Crafts Cyclization**

Wei-Dong Z. Li<sup>\*,†,‡</sup> and Xin-Wei Wang<sup>\*</sup>

<sup>\*</sup>State Key Laboratory of Applied Organic Chemistry, Lanzhou University, Lanzhou 730000, China;

<sup>‡</sup>State Key Laboratory of Elemento-organic Chemistry, Nankai University, Tianjin 300071, China

[wqli@nankai.edu.cn](mailto:wqli@nankai.edu.cn)

#### **Table of Contents**

|                                                                            |       |
|----------------------------------------------------------------------------|-------|
| 1. Preparation of compound <b>4b</b> .....                                 | S2    |
| 2. Cyclization of <b>4b</b> and spectral data of compound <b>4a</b> .....  | S3    |
| 3. Preparation of compound <b>6</b> .....                                  | S4-S5 |
| 4. Preparation of compound <b>8b</b> .....                                 | S6    |
| 5. Cyclization of <b>8b</b> and spectral data of <b>8a</b> .....           | S7    |
| 7. Spectral data of compound <b>10a</b> and its cyclization product.....   | S8    |
| 8. Spectral data of compound <b>10b</b> and its cyclization product.....   | S9    |
| 9. Spectral data of compound <b>11a</b> and its cyclization product .....  | S10   |
| 10. Spectral data of compound <b>12</b> and its cyclization product .....  | S11   |
| 11. Spectral data of compound <b>13a</b> and its cyclization product ..... | S12   |
| 12. Spectral data of compound <b>11b</b> and <b>13b</b> .....              | S13   |
| 10. Ring skeletal isomerization of <b>9b</b> .....                         | S14   |

#### **General**

For product purification by flash column chromatography, silica gel (200~300 mesh) and light petroleum ether (bp. 60~90 °C) are used unless otherwise noted. All solvents were purified and dried by standard techniques, and distilled prior to use. All organic extracts were dried over anhydrous sodium sulfate, unless otherwise noted. IR spectra were recorded on a *Nicolet NEXU 670 FT* spectrometer as liquid film. <sup>1</sup>H and <sup>13</sup>C NMR spectra were taken on a *Varian mercury-300*, *Bruker AM-200* or *AM-400* spectrometer with TMS as an internal standard and CDCl<sub>3</sub> as solvent. EI-MS was obtained on HP-5988A GC/MS instrument. HRMS were determined on a *Bruker Daltonics APEXII 47e FT-ICR* spectrometer. Melting points were measured on *Kofler* hot stage and are uncorrected. All moisture-sensitive reactions were performed in flame-dried glassware under stream of nitrogen. Other commercially available reagents and solvents were used as received without further purification unless indicated otherwise.

## Experimental

### Preparation of spiro enone **4b**

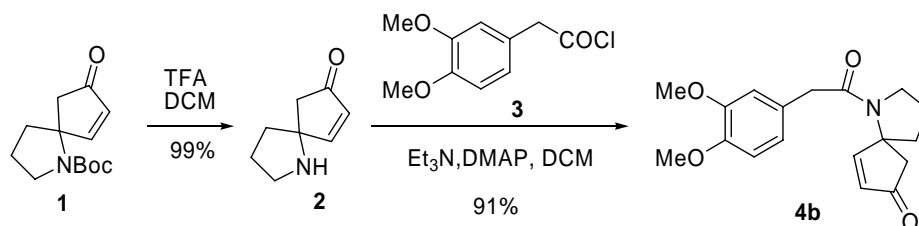

To a stirred mixture of compound **1** (238 mg, 1.0 mmol)<sup>1</sup> in dichloromethane (1 mL) was added TFA (1.0 mL) at 0 °C and the resulting mixture was stirred at the same temperature for 2 h. The solvent was evaporated under reduced pressure to give the crude **2** (140 mg). To a mixture of freshly prepared **3** [from the corresponding acid (294 mg, 1.50 mmol)] in dichloromethane (5 mL) was added dropwise a mixture of the above crude **2** in dichloromethane (2 mL). The resulting mixture was then treated with Et<sub>3</sub>N (2 mL) and DMAP (20 mg) and stirred at room temperature for 10 h. The reaction mixture was diluted with dichloromethane (50 mL), and washed with water (3 × 10 mL), 1N HCl (10 mL), brine (2 × 10 mL), dried over anhydrous MgSO<sub>4</sub>. After evaporation of the solvent, the resulting residue was purified by silica gel column chromatography eluting with petroleum ether-EtOAc (1 : 1) to give **4b** (287 mg, 91%) as a gum; *R<sub>f</sub>* = 0.4 (petroleum ether : EtOAc = 1 : 3); IR (film)  $\nu_{\max}$  2959, 1714, 1643, 1590, 1515, 1402, 1263, 1144, 1027, 792, 759 cm<sup>-1</sup>; <sup>1</sup>H NMR (300 MHz, CDCl<sub>3</sub>)  $\delta$  1.72-1.73 (m, 1H), 1.91-1.98 (m, 3H), 2.18-2.25 (dd, *J* = 3 Hz, 1H), 2.90-2.96 (dd, *J* = 3 Hz, 1H), 3.50-3.51 (m, 2H), 3.57-3.61 (m, 1H), 3.64-3.65 (m, 1H), 3.78 (s, 6H), 6.03-6.07 (m, 1H), 6.68-6.77 (m, 3H), 7.32-7.35 (m, 1H) ppm; <sup>13</sup>C NMR (75 MHz, CDCl<sub>3</sub>)  $\delta$  23.7, 39.0, 42.1, 46.5, 48.0, 55.6, 68.8, 111.1, 111.7, 120.9, 126.5, 131.5, 147.7, 148.8, 166.2, 169.7, 205.6 ppm; HRMS (ESI) *m/z* obsd 316.1546 ([*M*+H]<sup>+</sup> calcd 316.1543 for C<sub>18</sub>H<sub>22</sub>O<sub>4</sub>N).

<sup>1</sup> Prepared in an overall yield of ca. 30% from *L*-proline according to a published procedure by Ikeda et al. (Ikeda, M.; El Bialy, S. A. A.; Hirose, K.; Kotake, M.; Sato, T.; Bayomi, S. M. M.; Shehata, I. A.; Abdelal, A. M.; Gad, L. M.; Yakura, T. *Chem. Pharm. Bull.* **1999**, 47, 983). Compound **1**, mp. 62–64 °C; *R<sub>f</sub>* = 0.3 (PET : EtOAc = 3 : 1); IR (film)  $\nu_{\max}$  2975, 1718, 1690, 1389, 1169, 1121 cm<sup>-1</sup>; <sup>1</sup>H NMR (300 MHz, CDCl<sub>3</sub>)  $\delta$  1.26-1.54 (m, 9H), 1.78-2.18 (m, 4H), 2.30-2.40 (m, 1H), 2.74-2.97 (m, 1H), 3.39-3.67 (m, 2H), 6.08-6.15 (m, 1H), 7.33-7.45 (m, 1H) ppm; <sup>13</sup>C NMR (75 MHz, CDCl<sub>3</sub>)  $\delta$  22.7, 23.2, 28.1, 28.3, 39.7, 40.7, 47.0, 47.6, 47.8, 67.3, 79.7, 80.4, 131.8, 153.4, 166.8, 206.8 ppm; HRMS (ESI) *m/z* obsd 260.1261 ([*M*+Na]<sup>+</sup> calcd 260.1257 for C<sub>13</sub>H<sub>19</sub>O<sub>3</sub>NNa)

Cyclization of spiro enone **4b** to **5b**

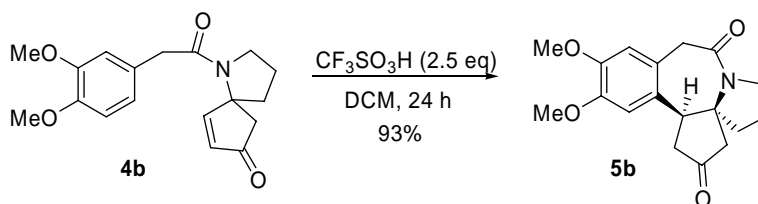

To a solution of compound **4b** (158 mg, 0.5 mmol) in dichloromethane (4 mL) was added  $\text{CF}_3\text{SO}_3\text{H}$  (187 mg, 1.25 mmol) in one portion. The resulting slurry was stirred vigorously at room temperature for 10 h, neutralized carefully with saturated aqueous  $\text{Na}_2\text{CO}_3$  solution at 0 °C, extracted with dichloromethane ( $5 \times 10$  mL), dried over anhydrous  $\text{MgSO}_4$ . After evaporation of the solvent, the crude residue was purified by silica gel column chromatography eluting with petroleum ether-EtOAc (1 : 1) to give **10** (147 mg, 93%) as colorless crystals, mp. 222–224 °C;<sup>2</sup>  $R_f$  = 0.3 (petroleum ether : EtOAc = 1 : 3); IR (film)  $\nu_{\text{max}}$  2959, 1742, 1635, 1516, 1423, 1262, 1111, 731  $\text{cm}^{-1}$ ;  $^1\text{H}$  NMR (300 MHz,  $\text{CDCl}_3$ )  $\delta$  1.77-1.90 (m, 2H) , 2.12-2.15 (m, 2H), 2.62-2.85 (m, 2H), 2.87-2.96 (m, 2H) , 3.35-3.45 (m, 2H), 3.60-3.68 (t,  $J$  = 10.5 Hz, 1H) , 3.72-3.80 (m, 2H) , 3.87 (s, 6H) , 6.68 (s, 1H), 6.82 (s, 1H) ppm;  $^{13}\text{C}$  NMR (75 MHz,  $\text{CDCl}_3$ )  $\delta$  20.4, 41.8, 44.6, 46.2, 46.9, 48.2, 52.0, 55.8, 56.0, 67.4, 113.3, 114.1, 125.4, 129.2, 147.8, 148.1, 169.2, 213.5 ppm; HRMS (ESI)  $m/z$  obsd 316.1538 ( $[\text{M}+\text{H}]^+$  calcd 316.1543 for  $\text{C}_{18}\text{H}_{22}\text{O}_4\text{N}$ ).

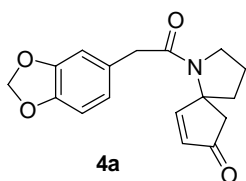

*Spectral data of 4a* (prepared analogously as **4b**):  $R_f$  = 0.3 (petroleum ether : EtOAc = 1 : 2); IR (film)  $\nu_{\text{max}}$  2933, 1712, 1643, 1490, 1443, 1403, 1246, 1037, 927, 791  $\text{cm}^{-1}$ ;  $^1\text{H}$  NMR (300 MHz,  $\text{CDCl}_3$ )  $\delta$  1.78-1.85 ( m, 1H), 1.95-2.06 (m, 3H), 2.27 (d,  $J$  = 17.4 Hz, 1H), 2.98 (d,  $J$  = 17.4 Hz, 1H), 3.54-3.71 (m, 4H), 5.92 (s, 2H), 6.10-6.13 (m, 1H), 6.64-6.76 (m, 3H), 7.40 (m, 1H) ppm;  $^{13}\text{C}$  NMR (75 MHz,  $\text{CDCl}_3$ )  $\delta$  23.7, 39.0, 42.0, 46.5, 48.1, 69.0, 100.8, 108.1, 109.2, 121.9, 127.6, 131.6, 146.4, 147.7 166.2, 169.8, 205.8 ppm; HRMS (ESI)  $m/z$  obsd 300.1232 ( $[\text{M}+\text{H}]^+$  calcd 300.1230 for  $\text{C}_{17}\text{H}_{18}\text{O}_4\text{N}$ ).

<sup>2</sup> Cf: Yasuda, S.; Yamada, T.; Hanaoka, M. *Tetrahedron Lett.* **1986**, 27, 2023.

### Preparation of spiro amino alcohol **6**

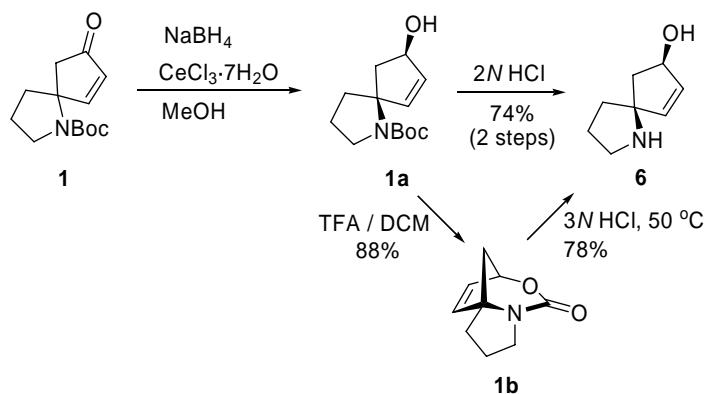

To a stirred mixture of compound **1** (238 mg, 1.0 mmol) in anhydrous methanol (3 mL) was added  $\text{CeCl}_3 \cdot 7\text{H}_2\text{O}$  (450 mg, 1.2 mmol), and stirring was continued for 20 min. at  $0^\circ\text{C}$ . To the above reaction mixture was added  $\text{NaBH}_4$  (42 mg, 1.1 mmol) portionwise at  $0^\circ\text{C}$ . After stirring for 20 min., the reaction mixture was diluted with EtOAc (50 mL), washed with water ( $3 \times 10\text{ mL}$ ), brine ( $2 \times 10\text{ mL}$ ), dried over anhydrous  $\text{MgSO}_4$ . After evaporation of the solvent, the crude residue was purified by silica gel column chromatography eluting with petroleum ether-EtOAc (5 : 1) to give the intermediate compound **1a** (222 mg, 92%) as a colorless oil,  $R_f = 0.4$  (petroleum ether : EtOAc = 3 : 1); IR (film)  $\nu_{\text{max}}$  3432, 2973, 1679, 1392, 1172, 772  $\text{cm}^{-1}$ ;  $^1\text{H}$  NMR (300 MHz,  $\text{CDCl}_3$ )  $\delta$  1.44 (s, 9H), 1.77-1.98 (m, 4H), 2.04-2.35 (m, 2H), 3.43 (t,  $J = 6.3\text{ Hz}$ , 2H), 4.90 (t,  $J = 8.4\text{ Hz}$ , 1H), 5.15 (d,  $J = 10.8\text{ Hz}$ , 1H), 5.63 (d,  $J = 5.4\text{ Hz}$ , 1H), 5.96-5.99 (m, 1H) ppm.  $^{13}\text{C}$  NMR (75 MHz,  $\text{CDCl}_3$ )  $\delta$  23.4, 28.7, 41.15, 46.7, 48.4, 72.5, 75.7, 79.9, 135.2, 136.0, 154.2 ppm. HRMS (ESI)  $m/z$  obsd 262.1410 ( $[\text{M}+\text{Na}]^+$  calcd 262.1414 for  $\text{C}_{13}\text{H}_{21}\text{O}_3\text{NNa}$ ).

A mixture of the above compound **1a** (240 mg, 1.0 mmol) in  $2\text{N HCl}$  (1 mL) was heated to  $50^\circ\text{C}$  for 30 min. and basicified with saturated aqueous  $\text{Na}_2\text{CO}_3$  to pH 12. The resulting mixture was extracted with  $\text{CHCl}_3$  ( $8 \times 10\text{ mL}$ ), dried over anhydrous  $\text{MgSO}_4$ , and evaporated under reduced pressure to give the residue, which was purified by silica gel column chromatography eluting with  $\text{CHCl}_3$ -MeOH (1 : 1) to give the compound **6** (107 mg, 80%) as a single diastereomer (the *cis*-configuration was deduced from the following experimental evidence on the formation of an intermediate **1b**).  $R_f = 0.2$  ( $\text{CHCl}_3$  :  $\text{CH}_3\text{OH}$  = 1 : 3), IR(film)  $\nu_{\text{max}}$  3277, 2959, 1401, 1539, 1083, 1053, 778  $\text{cm}^{-1}$ ;  $^1\text{H}$

NMR (300 MHz, CDCl<sub>3</sub>)  $\delta$  1.64-1.77 (m, 2H), 1.80-1.89 (m, 3H), 2.19-2.30 (m, 1H), 2.94-3.02 (m, 2H), 3.48 (s, 2H), 4.68-4.71 (m, 0.5H), 4.91-4.94 (m, 0.5H), 5.78-5.84 (m, 1.5H), 5.86-5.88 (m, 0.5H) ppm; <sup>13</sup>C NMR (75 MHz, CDCl<sub>3</sub>)  $\delta$  25.4, 25.7, 37.6, 38.9, 45.5, 46.0, 48.0, 48.7, 72.8, 73.4, 75.4, 75.6, 135.0, 135.2, 138.6, 139.5 ppm.

Cyclic urethane **1b**<sup>3</sup> was obtained cleanly (colorless gum, 88%) when the reduction product **1a** was treated with TFA in dichloromethane at 0 °C for 2 h, which was further hydrolyzed into the above spiro aminoalcohol **6** in a warming (50 °C) 3*N* hydrochloric acid solution. *Spectral data of 1b*: *R<sub>f</sub>* = 0.2 (petroleum ether : EtOAc = 3 : 1); IR (film)  $\nu_{max}$  2922, 1742, 1360, 1048 cm<sup>-1</sup>; <sup>1</sup>H NMR (300 MHz, CDCl<sub>3</sub>)  $\delta$  1.85-2.21 (m, 4H), 2.38 (d, *J* = 17.7, 1H), 2.68 (m, 1H), 3.16-3.24 (m, 1H), 3.58-3.67 (m, 1H), 5.23 (s, 1H), 5.87-5.90 (m, 1H), 6.06-6.08 (m, 1H) ppm. <sup>13</sup>C NMR (75 MHz, CDCl<sub>3</sub>)  $\delta$  25.6, 34.6, 44.2, 44.6, 73.8, 87.8, 128.7, 135.4, 160.4 ppm.

---

<sup>3</sup> For a known cyclic urethane structure, see: Venit, J. J.; DiPierro, M.; Magnus, P. *J. Org. Chem.* **1989**, *54*, 4298.

### Preparation of spiro enone **8b**

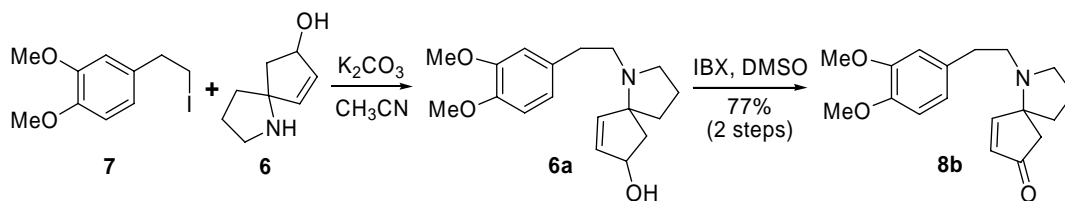

To a mixture of compound **6** (139 mg, 1.0 mmol) in CH<sub>3</sub>CN (10 mL) was added compound **7** (588 mg, 1.5 mmol) and K<sub>2</sub>CO<sub>3</sub> (276 mg, 2.0 mmol). The mixture was refluxed for 5 h, cooled down 0 °C, diluted with EtOAc (100 mL). The organic layer was washed with water (3 × 10 mL), brine (2 × 10 mL), and dried over anhydrous MgSO<sub>4</sub>. After evaporation of the solvent under reduced pressure, the crude residue was purified by silica gel column chromatography eluting with CHCl<sub>3</sub>-MeOH (30 : 1) to give the alcohol compound **6a** (257 mg, 85%). *Spectral data of 6a*:  $R_f$  = 0.4 (CHCl<sub>3</sub> : CH<sub>3</sub>OH = 10 : 1), IR(film)  $\nu_{max}$  3383, 2938, 1714, 1515, 1262, 1144, 1029, 807, 766, 731 cm<sup>-1</sup>; <sup>1</sup>H NMR (300 MHz, CDCl<sub>3</sub>)  $\delta$  1.66-1.87 (m, 5H), 2.08-2.14 (m, 1H), 2.61-2.75 (m, 5H), 2.95-3.01 (m, 1H), 3.83-3.86 (m, 6H), 4.76 (d,  $J$  = 4.8 Hz, 3H), 5.74-5.82 (m, 2H), 6.71-6.79 (m, 3H) ppm. <sup>13</sup>C NMR (75 MHz, CDCl<sub>3</sub>)  $\delta$  21.2, 35.4, 37.6, 40.1, 51.2, 51.7, 55.7, 74.7, 76.0, 111.0, 111.9, 120.4, 132.9, 134.8, 138.0, 147.1, 148.5 ppm.

To a mixture of allylic alcohol compound **6a** (303 mg, 1.0 mmol) in anhydrous DMSO (3 mL) was added IBX (700 mg, 2.5 mmol). The mixture was stirred for 1 h at 30 °C, diluted with EtOAc (100 mL). The organic layer was washed with water (2 × 10 mL), saturated aqueous NaHCO<sub>3</sub> (2 × 10 mL), and brine (10 mL), dried over anhydrous MgSO<sub>4</sub>. After the evaporation of the solvent, the crude residue was purified by silica gel column chromatography eluting with petroleum ether-EtOAc (1 : 1) to give **8b** (271 mg, 90%);  $R_f$  = 0.2 (petroleum ether : EtOAc = 1 : 3); IR(film)  $\nu_{ma}$  2938, 1714, 1515, 1462, 1263, 1144, 1029, 804 cm<sup>-1</sup>; <sup>1</sup>H NMR (300 MHz, CDCl<sub>3</sub>)  $\delta$  1.76-2.11 (m, 5H), 2.36-2.48(m, 3H), 2.62-2.70 (m, 3H), 3.10-3.12(m, 1H), 3.81-3.83 (m, 6H), 6.07-6.09 (m, 1H), 6.64-6.75 (m, 3H), 7.28-7.31 (m, 1H) ppm; <sup>13</sup>C NMR (75 MHz, CDCl<sub>3</sub>)  $\delta$  21.6, 35.5, 37.7, 40.8, 51.1, 51.5, 55.63 71.4, 110.9, 111.7, 120.3, 132.5, 133.9, 147.1, 148.5, 167.7, 207.7 ppm; HRMS (ESI)  $m/z$  obsd 302.1756 ([M+H]<sup>+</sup> calcd 302.1751 for C<sub>18</sub>H<sub>24</sub>O<sub>3</sub>N).

*Cyclization of spirocyclic enone **8b** to **9b***

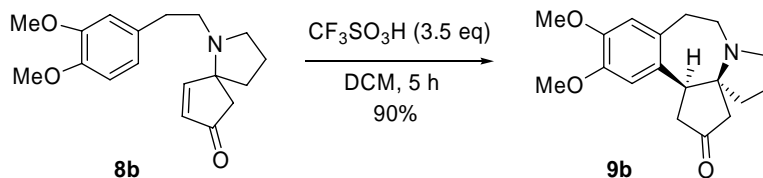

To a mixture of compound **8b** (300 mg, 1.0 mmol) in dichloromethane (5 mL) was added  $\text{CF}_3\text{SO}_3\text{H}$  (525 mg, 3.5 mmol). The resulting slurry was stirred vigorously at room temperature for 5 h, basicified with saturated aqueous  $\text{Na}_2\text{CO}_3$ , extracted with dichloromethane ( $5 \times 10$  mL), dried over anhydrous  $\text{MgSO}_4$ . After evaporation of the solvent, the crude residue was purified by silica gel column chromatography eluting with petroleum ether-EtOAc (1 : 3) to give **9b** (271 mg, yield 90%) as a colourless gum;  $R_f$  = 0.2 (EtOAc); IR (film)  $\nu_{\text{max}}$  2940, 1737, 1516, 1461, 1259, 1223, 1118, 730  $\text{cm}^{-1}$ ;  $^1\text{H}$  NMR (300 MHz,  $\text{CDCl}_3$ )  $\delta$  1.65-2.11 (m, 5H), 2.47-2.80 (m, 6H), 2.82-3.08 (m, 3H), 3.61 (t,  $J$  = 9.6 Hz, 1H), 3.86 (s, 6H), 6.66 (s, 1H), 6.70 (s, 1H), ppm;  $^{13}\text{C}$  NMR (75 MHz,  $\text{CDCl}_3$ )  $\delta$  20.0, 31.0, 41.8, 42.4, 44.9, 47.9, 50.1, 53.8, 55.8, 55.9, 66.8, 113.5, 113.7, 129.1, 131.8, 147.0, 147.6, 217.3 ppm; HRMS (ESI)  $m/z$  obsd 302.1745 ( $[\text{M}+\text{H}]^+$ ) calcd 302.1751 for  $\text{C}_{18}\text{H}_{24}\text{O}_3\text{N}$ .

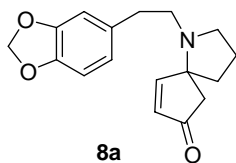

*Spectral data of **8a***:  $R_f$  = 0.2 (petroleum ether : EtOAc = 2 : 1); IR (film)  $\nu_{\text{max}}$  2926, 1712, 1682, 1573, 1490, 1442, 1248, 1189, 1038, 930, 809  $\text{cm}^{-1}$ ;  $^1\text{H}$  NMR (300 MHz,  $\text{CDCl}_3$ )  $\delta$  1.78-2.15 (m, 5H), 2.40-2.69 (m, 3H), 2.67-2.72 (m, 3H), 3.11-3.19 (m, 1H), 5.92 (s, 2H), 6.13 (d,  $J$  = 5.4 Hz, 1H), 6.61 (t,  $J$  = 10.5 Hz, 2H), 6.72 (d,  $J$  = 8.1 Hz, 1H), 7.34 (d,  $J$  = 5.7 Hz, 1H) ppm;  $^{13}\text{C}$  NMR (75 MHz,  $\text{CDCl}_3$ )  $\delta$  21.7, 35.6, 37.8, 40.9, 51.4, 51.6, 71.7, 100.8, 108.1, 109.1, 121.4, 133.8, 134.1, 145.8, 147.4, 167.7, 207.8 ppm; HRMS (ESI)  $m/z$  obsd 286.1434 ( $[\text{M}+\text{H}]^+$ ) calcd 286.1438 for  $\text{C}_{17}\text{H}_{20}\text{O}_3\text{N}$ .

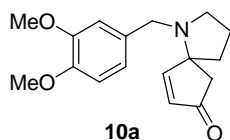

*Spectral data of 10a* (prepared analogously as **8b**):  $R_f$  = 0.4 (petroleum ether : EtOAc = 2 : 1); IR (film)  $\nu_{max}$  2957, 1714, 1590, 1513, 1462, 1263, 1234, 1138, 1028, 802  $\text{cm}^{-1}$ ;  $^1\text{H}$  NMR (300 MHz,  $\text{CDCl}_3$ )  $\delta$  1.84-1.94 (m, 3H), 2.01-2.16 (m, 1H), 2.20 (d,  $J$  = 18.3 Hz, 3H), 2.51-2.56 (m, 1H), 2.60 (d,  $J$  = 18.3 Hz, 3H), 2.92-3.01 (m, 1H), 3.45 (dd,  $J$  = 12.9 Hz, 2H), 3.86 (s, 3H), 3.88 (s, 3H), 6.15 (d,  $J$  = 5.4 Hz, 1H), 6.80-6.82 (m, 3H), 7.45 (d,  $J$  = 5.4 Hz, 1H) ppm;  $^{13}\text{C}$  NMR (75 MHz,  $\text{CDCl}_3$ )  $\delta$  21.5, 38.0, 40.8, 51.6, 53.1, 55.8, 71.3, 110.7, 111.3, 120.3, 131.8, 133.8, 147.9, 148.7, 168.0, 207.9 ppm; HRMS (ESI)  $m/z$  obsd 288.1591 ( $[\text{M}+\text{H}]^+$  calcd 288.1594 for  $\text{C}_{17}\text{H}_{22}\text{O}_3\text{N}$ ).

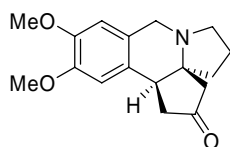

*Spectral data of cyclization product (similar conditions as for 8b, 92%)<sup>4</sup> of 10a*:  $R_f$  = 0.2 (petroleum ether : EtOAc = 1 : 3); IR (film)  $\nu_{max}$  2937, 1740, 1516, 1461, 1256, 1100, 755  $\text{cm}^{-1}$ ;  $^1\text{H}$  NMR (300MHz,  $\text{CDCl}_3$ )  $\delta$  1.86-2.05 (m, 5H), 2.30 (d,  $J$  = 17.4 Hz, 1H), 2.59-2.65 (m, 2H), 2.76 (dd,  $J$  = 18.9 Hz, 1H), 3.12-3.18 (m, 1H), 3.35 (d,  $J$  = 7.5 Hz, 1H), 3.68 (d,  $J$  = 15.9 Hz, 1H), 3.85 (s, 6H), 3.95 (d,  $J$  = 15.9 Hz, 1H), 6.56 (s, 1H), 6.61 (s, 1H) ppm;  $^{13}\text{C}$  NMR (75 MHz,  $\text{CDCl}_3$ )  $\delta$  20.0, 37.5, 38.6, 42.7, 44.7, 48.6, 51.5, 55.9, 55.8, 66.25, 109.0, 110.7, 125.4, 128.1, 147.6, 148.2, 216.4 ppm; HRMS (ESI)  $m/z$  obsd 288.1593 ( $[\text{M}+\text{H}]^+$  calcd 288.1594 for  $\text{C}_{17}\text{H}_{22}\text{O}_3\text{N}$ ).

<sup>4</sup> A single diastereomer of the cyclization product was obtained.



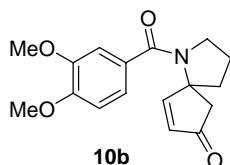

*Spectral data of 10b:*  $R_f$  = 0.3 (petroleum ether : EtOAc = 1 : 1); IR (film)  $\nu_{max}$  2968, 1714, 1626, 1582, 1516, 1456, 1420, 1391, 1338, 1263, 1184, 1139, 1024, 751  $\text{cm}^{-1}$ ;  $^1\text{H}$  NMR (300 MHz,  $\text{CDCl}_3$ )  $\delta$  1.91-2.02 (m, 2H), 2.04-2.19 (m, 1H), 2.33 (d,  $J$  = 17.4 Hz, 1H), 3.29 (d,  $J$  = 17.4 Hz, 1H), 3.64-3.72 (m, 2H), 3.89 (s, 6H), 6.18 (d,  $J$  = 5.7 Hz, 1H), 6.85 (d,  $J$  = 8.1 Hz, 1H), 7.10-7.13 (m, H), 7.49 (d,  $J$  = 5.7 Hz, 1H) ppm;  $^{13}\text{C}$  NMR (75 MHz,  $\text{CDCl}_3$ )  $\delta$  24.2, 39.5, 46.6, 51.1, 55.71, 69.4, 109.9, 110.6, 119.9, 129.0, 132.2, 148.5, 150.4, 165.7, 169.0, 206.0 ppm; HRMS (ESI)  $m/z$  obsd 302.1391 ( $[\text{M}+\text{H}]^+$  calcd 302.1387 for  $\text{C}_{17}\text{H}_{20}\text{O}_4\text{N}$ ).

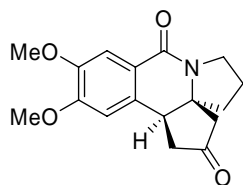

*Spectral data of cyclization product (85%) of 10b:* mp. 210–212  $^{\circ}\text{C}$ ;  $R_f$  = 0.2 (petroleum ether : EtOAc = 1 : 2); IR (film)  $\nu_{max}$  2963, 1745, 1643, 1601, 1514, 1459, 1435, 1385, 1278, 1217, 1103, 778, 731  $\text{cm}^{-1}$ ;  $^1\text{H}$  NMR (300 MHz,  $\text{CDCl}_3$ )  $\delta$  1.92-2.15 (m, 5H), 2.31 (d,  $J$  = 6.3 Hz, 2H), 2.75 (dd,  $J$  = 7.5 Hz, 1H), 3.01 (d,  $J$  = 18.9 Hz, 1H), 3.61 (d,  $J$  = 6.8 Hz, 1H), 3.70-3.79 (m, 2H), 3.90 (s, 6H), 6.62 (s, 1H), 7.61 (s, 1H) ppm;  $^{13}\text{C}$  NMR (75 MHz,  $\text{CDCl}_3$ )  $\delta$  20.8, 39.3, 43.7, 43.9, 45.3, 47.3, 56.1, 66.4, 108.5, 110.5, 122.2, 130.8, 148.4, 152.3, 161.6, 212.5 ppm; HRMS (EI)  $m/z$  obsd 301.1313 ( $[\text{M}]^+$  calcd 301.1309 for  $\text{C}_{17}\text{H}_{19}\text{O}_4\text{N}$ ).

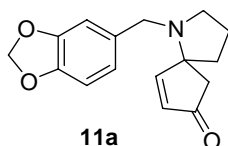

*Spectral data of 11a:*  $R_f$  = 0.5 (petroleum ether : EtOAc = 2 : 1), IR (film)  $\nu_{max}$  2911, 1715, 1489, 1443, 1242, 1038, 929, 804  $\text{cm}^{-1}$ ;  $^1\text{H}$  NMR (300 MHz,  $\text{CDCl}_3$ )  $\delta$  1.80-1.96 (m, 3H), 2.04-2.11 (m, 1H), 2.15 (d,  $J$  = 18 Hz, 1H), 2.48-2.52 (m, 1H), 2.59 (d,  $J$  = 18 Hz, 1H), 2.89-2.97 (m, 1H), 3.25 (d,  $J$  = 13.2 Hz, 1H), 3.42 (d,  $J$  = 13.2 Hz, 1H), 5.93 (s, 2H), 6.16 (d,  $J$  = 5.7 Hz, 1H), 6.72-6.81 (m, 3H), 7.44 (d,  $J$  = 5.7 Hz, 1H) ppm;  $^{13}\text{C}$  NMR (75 MHz,  $\text{CDCl}_3$ )  $\delta$  21.6, 38.0, 41.0, 51.5, 53.1, 71.4, 100.8, 107.9, 108.6, 121.2, 133.3, 134.0, 146.5, 147.6, 167.9, 207.9 ppm; HRMS (ESI)  $m/z$  obsd 272.1277 ( $[\text{M}+\text{H}]^+$  calcd 272.1281 for  $\text{C}_{16}\text{H}_{18}\text{O}_3\text{N}$ ).

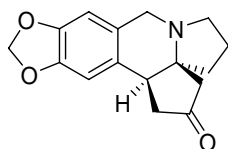

*Spectral data of cyclization product (90%) of 11a:*  $R_f$  = 0.25 (petroleum ether : EtOAc = 2 : 1); IR (film)  $\nu_{max}$  2899, 1740, 1484, 1234, 1038, 934, 730  $\text{cm}^{-1}$ ;  $^1\text{H}$  NMR (300 MHz,  $\text{CDCl}_3$ )  $\delta$  1.84-2.05 (m, 5H), 2.30 (d,  $J$  = 17.4 Hz, 1H), 2.53-2.67 (m, 2H), 2.75 (dd,  $J$  = 18.6 Hz, 1H), 3.10-3.17 (m, 1H), 3.33 (d,  $J$  = 8.4 Hz, 1H), 3.67 (d,  $J$  = 15.9 Hz, 1H), 3.90 (d,  $J$  = 15.9 Hz, 1H), 5.91 (s, 1H), 5.93 (s, 1H), 6.54 (s, 1H), 6.61 (s, 1H) ppm;  $^{13}\text{C}$  NMR (75 MHz,  $\text{CDCl}_3$ )  $\delta$  20.2, 37.6, 38.8, 43.3, 44.8, 49.0, 51.5, 66.3, 100.9, 106.3, 108.0, 126.6, 129.5, 146.2, 147.0, 216.2 ppm; HRMS (ESI)  $m/z$  obsd 272.1285 ( $[\text{M}+\text{H}]^+$  calcd 272.1281 for  $\text{C}_{16}\text{H}_{18}\text{O}_3\text{N}$ ).

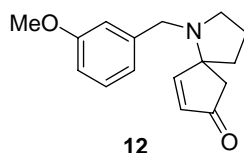

*Spectral data of 12:*  $R_f = 0.4$  (petroleum ether : EtOAc = 3 : 1); IR (film)  $\nu_{max}$  2961, 1715, 1660, 1601, 1488, 1458, 1266, 1156, 1047, 785  $\text{cm}^{-1}$ ;  $^1\text{H}$  NMR (300 MHz,  $\text{CDCl}_3$ )  $\delta$  1.83-1.94 (m, 3H), 2.02-2.09 (m, 1H), 2.20 (d,  $J = 18.6$  Hz, 1H), 2.54-2.61 (m, 1H), 2.58 (d,  $J = 18.6$  Hz, 1H), 2.92-2.98 (m, 1H), 3.31 (d,  $J = 13.2$  Hz, 1H), 3.50 (d,  $J = 13.2$  Hz, 1H), 3.80 (s, 3H), 6.16 (d,  $J = 5.7$  Hz, 1H), 6.76 -6.96 (m, 3H), 7.19-7.24 (m, 1H), 7.47 (d,  $J = 5.7$  Hz, 1H) ppm;  $^{13}\text{C}$  NMR (75 MHz,  $\text{CDCl}_3$ )  $\delta$  21.6, 37.9, 41.0, 51.6, 53.2, 55.1, 71.4, 112.0, 113.9, 120.5, 129.2, 134.0, 141.1, 159.6, 167.9, 207.9 ppm; HRMS (ESI)  $m/z$  obsd 258.1487 ( $[\text{M}+\text{H}]^+$  calcd 258.1489 for  $\text{C}_{16}\text{H}_{20}\text{O}_2\text{N}$ ).

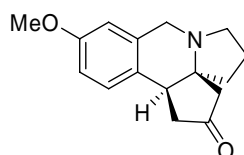

*Spectral data of major cyclization product (82%) of 12:*  $R_f = 0.3$  (petroleum ether : EtOAc = 1 : 1), IR(film)  $\nu_{max}$  2958, 1740, 1612, 1501, 1246, 1164, 1038  $\text{cm}^{-1}$ ;  $^1\text{H}$  NMR (300 MHz,  $\text{CDCl}_3$ )  $\delta$  1.89 -2.05 (m, 5H), 2.30 (d,  $J = 17.4$  Hz, 1H), 2.58-2.81 (m, 3H), 3.10-3.16 (m, 1H), 3.35 (d,  $J = 8.1$  Hz, 1H), 3.79 (d,  $J = 15.9$  Hz, 1H), 3.78 (s, 3H), 3.98 (d,  $J = 15.9$  Hz, 1H), 6.61 (d,  $J = 1.8$  Hz, 1H), 6.71-6.81 (m, 1H), 7.07 (d,  $J = 9$  Hz, 1H) ppm;  $^{13}\text{C}$  NMR (75 MHz,  $\text{CDCl}_3$ )  $\delta$  20.2, 37.6, 39.0, 42.5, 44.8, 49.2, 51.7, 55.2, 68.5, 111.2, 113.6, 128.4, 129.6, 134.6, 157.9, 216.5 ppm; HRMS (ESI)  $m/z$  obsd 258.1486 ( $[\text{M}+\text{H}]^+$  calcd 258.1489  $\text{C}_{16}\text{H}_{20}\text{O}_2\text{N}$ ).

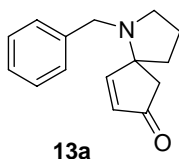

*Spectral data of 13a:*  $R_f$  = 0.4 (petroleum ether : EtOAc = 3 : 1); IR (film)  $\nu_{max}$  2965, 2800, 1716, 1664, 1586, 1494, 1453, 1406, 1343, 1262, 1183, 1070, 800, 742, 702  $\text{cm}^{-1}$ ;  $^1\text{H}$  NMR (300 MHz,  $\text{CDCl}_3$ )  $\delta$  1.81-1.99 (m, 3H), 2.03-2.15 (m, 1H), 2.20 (d,  $J$  = 18.6 Hz, 1H), 2.50-2.57 (m, 1H), 2.59 (d,  $J$  = 18.6 Hz, 1H), 2.89-2.97 (m, 1H), 3.34 (d,  $J$  = 13.5 Hz, 1H), 3.53 (d,  $J$  = 13.5 Hz, 1H) ppm;  $^{13}\text{C}$  NMR (75 MHz,  $\text{CDCl}_3$ )  $\delta$  21.6, 38.0, 41.0, 51.6, 53.3, 71.5, 126.9, 128.3, 134.0, 139.4, 138.0, 208.0 ppm; HRMS (ESI)  $m/z$  obsd 228.1378 ( $[\text{M}+\text{H}]^+$  calcd 228.1383 for  $\text{C}_{15}\text{H}_{18}\text{ON}$ ).

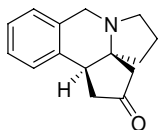

*Spectral data of cyclization product (under refluxing conditions, 75%) of 13a:*  $R_f$  = 0.2 (petroleum ether : EtOAc = 2 : 1); IR (film)  $\nu_{max}$  2922, 1741, 1650, 1455, 1402, 1267, 1167, 752  $\text{cm}^{-1}$ ;  $^1\text{H}$  NMR (300 MHz,  $\text{CDCl}_3$ )  $\delta$  1.84-2.02 (m, 5H), 2.30 (d,  $J$  = 18 Hz, 1H), 2.63-2.69 (m, 2H), 2.80 (dd,  $J$  = 5.1 Hz, 1H), 3.13-3.20 (m, 1H), 3.43 (d,  $J$  = 5.4 Hz, 1H), 3.76 (d,  $J$  = 15.9 Hz, 1H), 4.03 (d,  $J$  = 15.9 Hz, 1H) ppm;  $^{13}\text{C}$  NMR (75 MHz,  $\text{CDCl}_3$ )  $\delta$  20.2, 37.6, 39.2, 43.3, 44.7, 49.1, 51.7, 66.4, 126.3, 126.8, 127.2, 128.6, 133.4, 136.5, 216.3 ppm. HRMS (ESI)  $m/z$  obsd 228.1376 ( $[\text{M}+\text{H}]^+$  calcd 228.1382 for  $\text{C}_{15}\text{H}_{18}\text{ON}$ ).

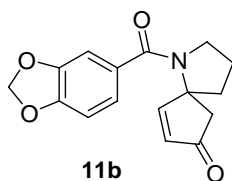

*Spectral data of 11b*:  $R_f$  = 0.3 (petroleum ether : EtOAc = 2 : 1); IR (film)  $\nu_{max}$  2963, 1710, 1625, 1599, 1501, 1442, 1394, 1246, 1035, 927, 804, 757  $\text{cm}^{-1}$ ;  $^1\text{H}$  NMR (300 MHz,  $\text{CDCl}_3$ )  $\delta$  1.90-2.01 (m, 3H), 2.02-2.15 (m, 1H), 2.35 (d,  $J$  = 17.4 Hz, 1H), 3.23 (d,  $J$  = 17.4 Hz, 1H), 3.62-3.64 (m, 2H), 5.98 (s, 2H), 6.18 (d,  $J$  = 4.8 Hz, 1H), 6.79 (d,  $J$  = 10.8 Hz, 1H), 6.98-7.03 (m, 2H), 7.47 (d,  $J$  = 4.8 Hz, 1H) ppm;  $^{13}\text{C}$  NMR (75 MHz,  $\text{CDCl}_3$ )  $\delta$  24.1, 39.6, 46.5, 51.06, 69.3, 101.2, 107.6, 107.7, 121.3, 130.4, 132.2, 147.2, 148.8, 165.7, 168.8, 206.0 ppm; HRMS (ESI)  $m/z$  obsd 286.1069 ( $[\text{M}+\text{H}]^+$  calcd 286.1074 for  $\text{C}_{16}\text{H}_{16}\text{O}_4\text{N}$ ).

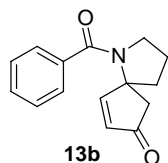

*Spectral data of 13b*: mp. 115–117 °C;  $R_f$  = 0.4 (petroleum ether : EtOAc = 2 : 1 ); IR (film)  $\nu_{max}$  2971, 1714, 1628, 1578, 1401. 1341, 1261, 1191, 1071, 792, 727, 703, 659  $\text{cm}^{-1}$ ;  $^1\text{H}$  NMR (300 MHz,  $\text{CDCl}_3$ )  $\delta$  1.93-2.01 (m, 3H), 2.10-2.19 (m, 1H), 2.38 (d,  $J$  = 17.4 Hz, 1H), 3.30 (d,  $J$  = 17.4 Hz, 1H), 3.59-3.61 (m, 2H), 6.24 (d,  $J$  = 4.5 Hz, 1H), 7.41-7.53 (m, 6H) ppm;  $^{13}\text{C}$  NMR (75 MHz,  $\text{CDCl}_3$ )  $\delta$  24.2, 39.6, 46.6, 51.1, 69.3, 126.6, 128.2, 129.9, 132.4, 136.8, 165.8, 169.6, 206.1 ppm; HRMS (ESI)  $m/z$  obsd 242.1175 ( $[\text{M}+\text{H}]^+$  calcd 242.1176 for  $\text{C}_{15}\text{H}_{16}\text{O}_2\text{N}$ ).

*Skeletal isomerization of **9b** and formation of cyclopentanone products **9b'** and **14***

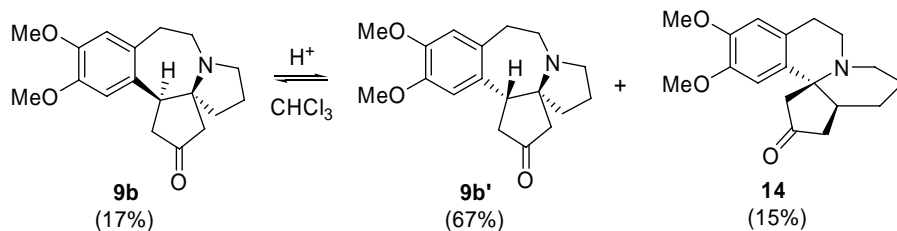

Compound **9b** (300 mg, 1.0 mmol) in  $\text{CHCl}_3$  (10 mL) was kept at room temperature for a period of 45 days. After evaporation of the solvent under reduced pressure, the resulting residue was purified by silica gel column chromatography eluting with pure EtOAc to give the known ketone **14** (45 mg, 15%) as a colorless crystals (mp. 171–172 °C)<sup>5</sup>, followed by starting ketone **9b** (50 mg, 17%) as a colorless gum; a more polar fraction was eluted with 5–10 % MeOH in  $\text{CHCl}_3$  to give trans ketone **9b'** (200 mg, 67%) as colorless crystals (mp. 223–225 °C). *Spectral data of **9b'***:  $R_f = 0.4$  ( $\text{CHCl}_3$  :  $\text{CH}_3\text{OH} = 10 : 1$ ); IR (film)  $\nu_{\text{max}}$  2958, 1744, 1516, 1463, 1298, 1278, 1219, 1116, 730  $\text{cm}^{-1}$ ;  $^1\text{H}$  NMR (300 MHz,  $\text{CDCl}_3$ )  $\delta$  1.40–1.46 (m, 2H), 1.70–1.74 (m, 1H), 1.84–1.90 (m, 1H), 2.45–2.53 (m, 2H), 2.55–2.91 (m, 5H), 2.96–3.04 (m, 1H), 3.10–3.16 (m, 1H), 3.22–3.28 (m, 1H), 3.88 (s, 6H), 4.12 (dd,  $J = 7.6$  Hz, 1H), 6.61 (s, 1H), 6.68 (s, 1H) ppm;  $^{13}\text{C}$  NMR (75 MHz,  $\text{CDCl}_3$ )  $\delta$  20.7, 26.6, 34.0, 42.4, 44.4, 50.1, 53.8, 54.6, 55.8, 56.1, 70.7, 110.1, 112.7, 128.8, 133.4, 146.9, 147.4, 213.7 ppm; HRMS (ESI)  $m/z$  obsd 302.1753 ( $[\text{M}+\text{H}]^+$  calcd 302.1751 for  $\text{C}_{18}\text{H}_{24}\text{O}_3\text{N}$ ).

*Spectral data of **14***:<sup>5</sup>  $R_f = 0.4$  (EtOAc); IR (film)  $\nu_{\text{max}}$  2933, 1741, 1607, 1513, 1462, 1257, 1219  $\text{cm}^{-1}$ ;  $^1\text{H}$  NMR (300 MHz,  $\text{CDCl}_3$ )  $\delta$  1.40–1.54 (m, 2H), 1.56–1.60 (m, 1H), 1.82–1.88 (m, 1H), 2.26 (d,  $J = 17.7$  Hz, 1H), 2.30–2.38 (m, 2H), 2.62–2.66 (m, 2H), 2.86 (d,  $J = 17.7$  Hz, 1H), 2.83–2.90 (m, 2H), 3.02–3.11 (m, 2H), 3.32–3.41 (m, 1H), 3.83 (s, 3H), 3.84 (s, 3H), 6.56 (s, 1H), 6.77 (s, 1H) ppm;  $^{13}\text{C}$  NMR (75 MHz,  $\text{CDCl}_3$ )  $\delta$  19.5, 21.8, 22.0, 38.3, 39.0, 45.2, 47.4, 55.6, 56.0, 56.8, 63.1, 107.6, 111.9, 127.1, 128.4, 147.6, 147.8, 215.9 ppm; HRMS (ESI)  $m/z$  obsd  $[\text{M}+\text{NH}_4]^+$  318.1690 ( $[\text{M}+\text{H}]^+$  calcd 302.1751 for  $\text{C}_{18}\text{H}_{24}\text{O}_3\text{N}$ ).

<sup>5</sup> For an alternative preparation and X-ray structure, see: Li, W.-D. Z.; Ma, B.-C. *J. Org. Chem.* **2005**, 70, 3277.
